# Supplementary material for: Co2 and Co3 Mixed Cluster Secondary Building Unit Approach toward a Three-Dimensional Metal-Organic Framework with Permanent Porosity
Source: MDPI journal article supplement (doi:10.3390/molecules23040755), 2018-03-25
Supplement: s1 [file s1]

# Co<sub>2</sub> and Co<sub>3</sub> Mixed Cluster Secondary Building Unit Approach toward a Three-Dimensional Metal-Organic Framework with Permanent Porosity

Meng-Yao Chao, Wen-Hua Zhang \* and Jian-Ping Lang \*

College of Chemistry, Chemical Engineering and Materials Science, Soochow University, Suzhou 215123, China; 15062328714@163.com

\* Correspondence: whzhang@suda.edu.cn (W.-H.Z.); jplang@suda.edu.cn (J.-P.L.); Tel.: Tel.: 86-512-65883615 (W.-H.Z.)

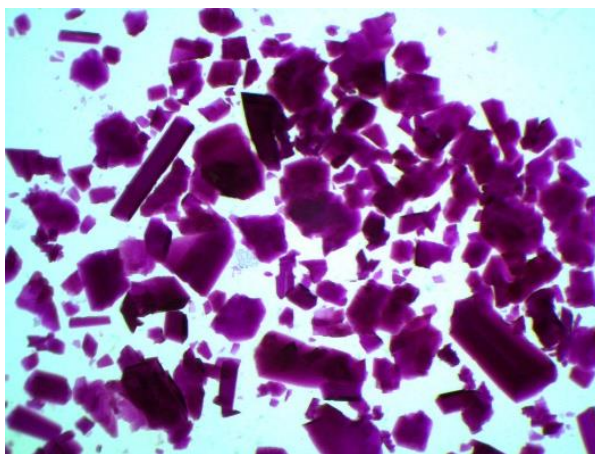

**Figure S1.** The photo of as-synthesized MOF 1 crystals.

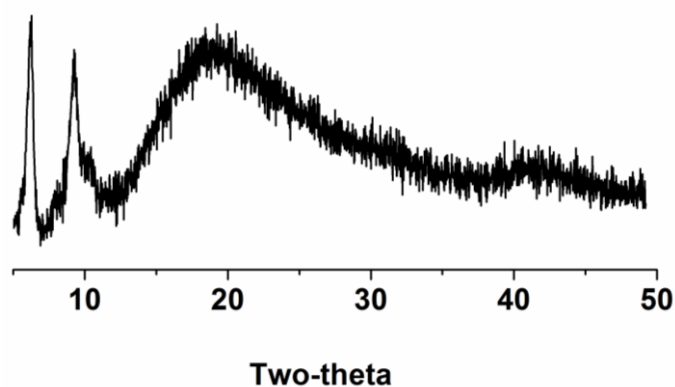

**Figure S2.** The PXRD pattern of MOF 1 after BET test showing its amorphous nature.

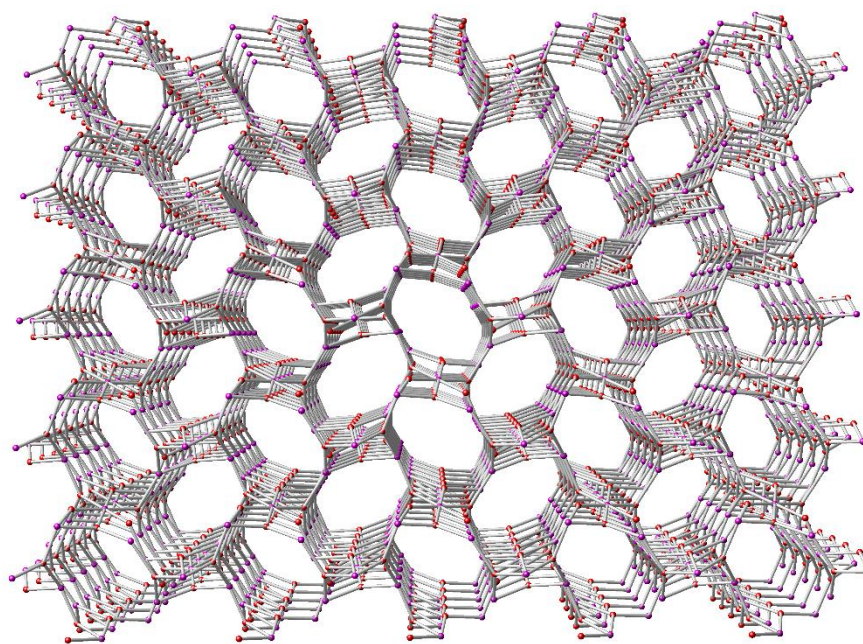

**Figure S3.** The topological network of MOF **1** by considering the  $\text{Co}_3$  SBU as a 6-connecting node, while the two types of  $\text{Co}_2$  SBUs, as well as three independent BTB ligands as 3-connecting nodes.
